# Supplementary material for: Pregnenolone derivatives for the treatment of Alzheimer's disease: synthesis, and in vitro inhibition of amyloid β 1–42 peptide aggregation, acetylcholinesterase and carbonic anhydrase-II
Source: Royal Society of Chemistry journal article supplement (doi:10.1039/d4ra01536c), 2024-01-01
Supplement: d4ra01536c1.pdf [file d4ra01536c1.pdf]

## Supporting Information

### **Pregnenolone derivatives for the treatment of Alzheimer's disease: Synthesis, in-vitro inhibition of amyloid $\beta_{1-42}$ peptide aggregation, acetylcholinesterase and carbonic anhydrase-II**

Ayesha Tahir <sup>a, †</sup>, Bushra Mobeen <sup>a, †</sup>, Fahad Hussain <sup>a</sup>, Abdul Sadiq <sup>b</sup>,

and Umer Rashid <sup>\*a</sup>

<sup>a</sup> Department of Chemistry, COMSATS University Islamabad, Abbottabad Campus,  
22060 Abbottabad, Pakistan

<sup>b</sup> Department of Pharmacy, University of Malakand, 18000 Chakdara, KP, Pakistan

† These authors have equal contribution

**Corresponding author (\*):** Email: [umerrashid@cuiatd.edu.pk](mailto:umerrashid@cuiatd.edu.pk) (Umer Rashid)  
(Department of Chemistry, COMSATS University Islamabad, Abbottabad Campus,  
22060 Abbottabad, Pakistan)

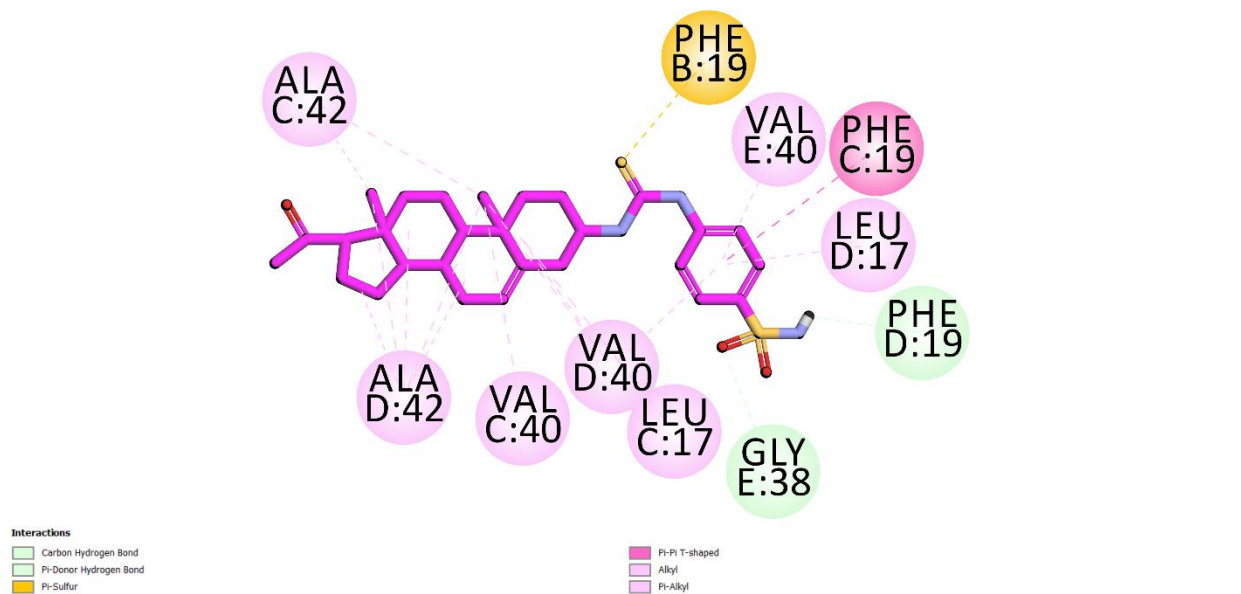

**Figure S-1.** 2-D interaction plot of inhibitor **15** with A $\beta$  protofibrils (PDB ID: 2BEG)

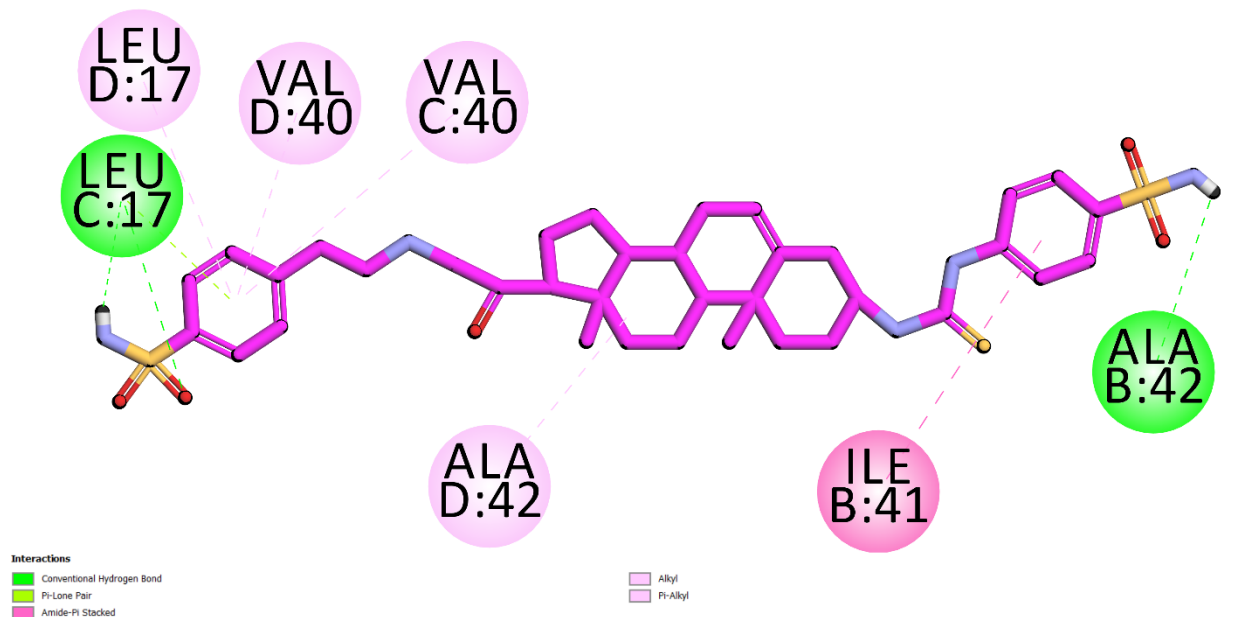

**Figure S-2.** 2-D interaction plot of inhibitor **23** with A $\beta$  protofibrils (PDB ID: 2BEG)

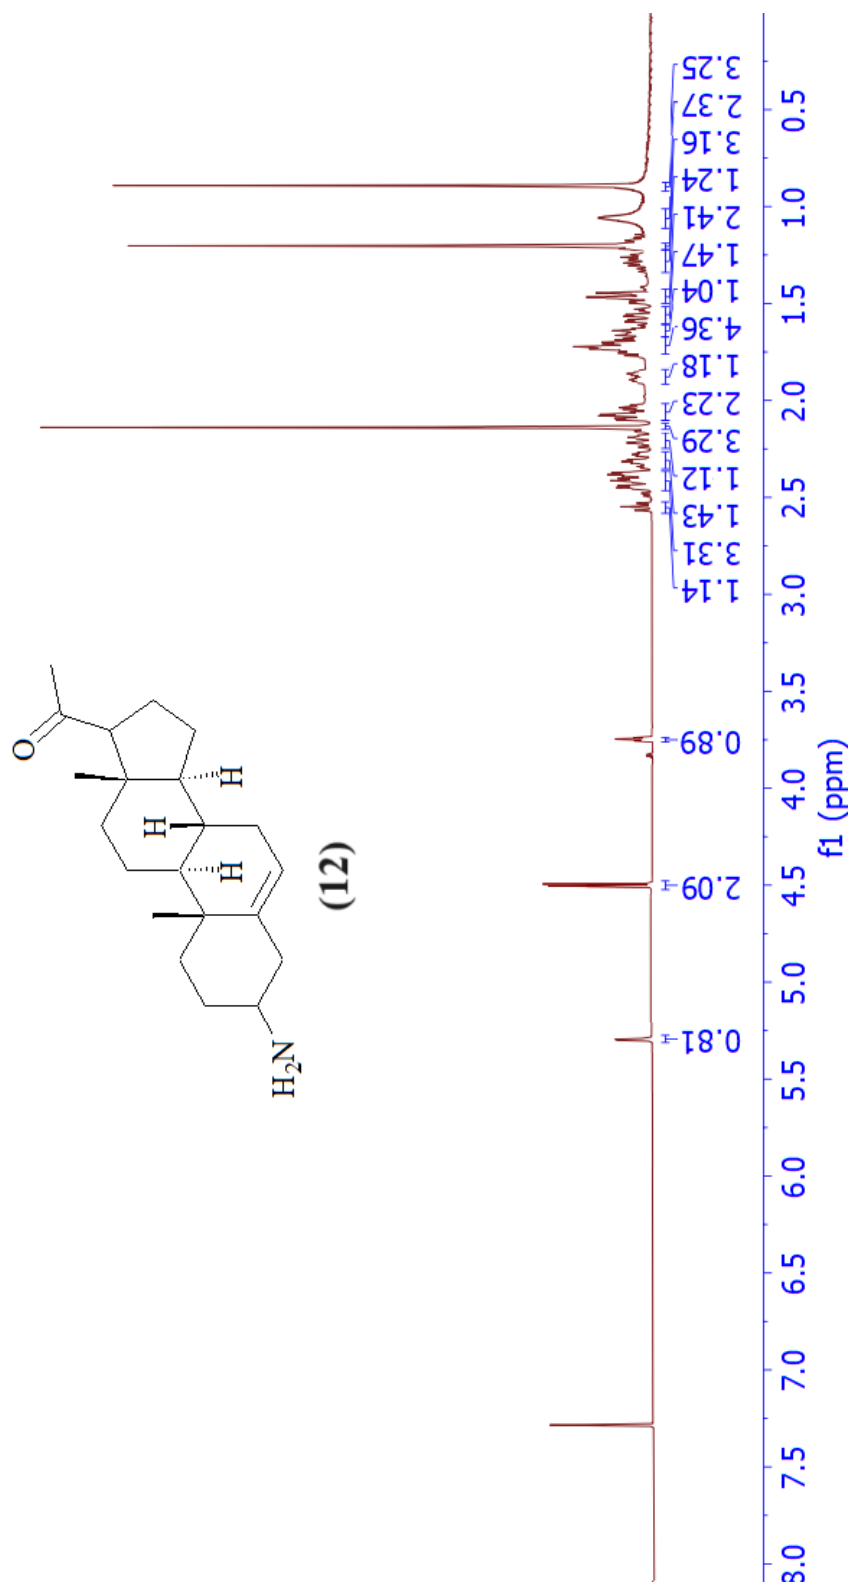

Figure S-3:  $^1\text{H-NMR}$  spectrum (400 MHz,  $\text{CDCl}_3$ ) of compound **12**

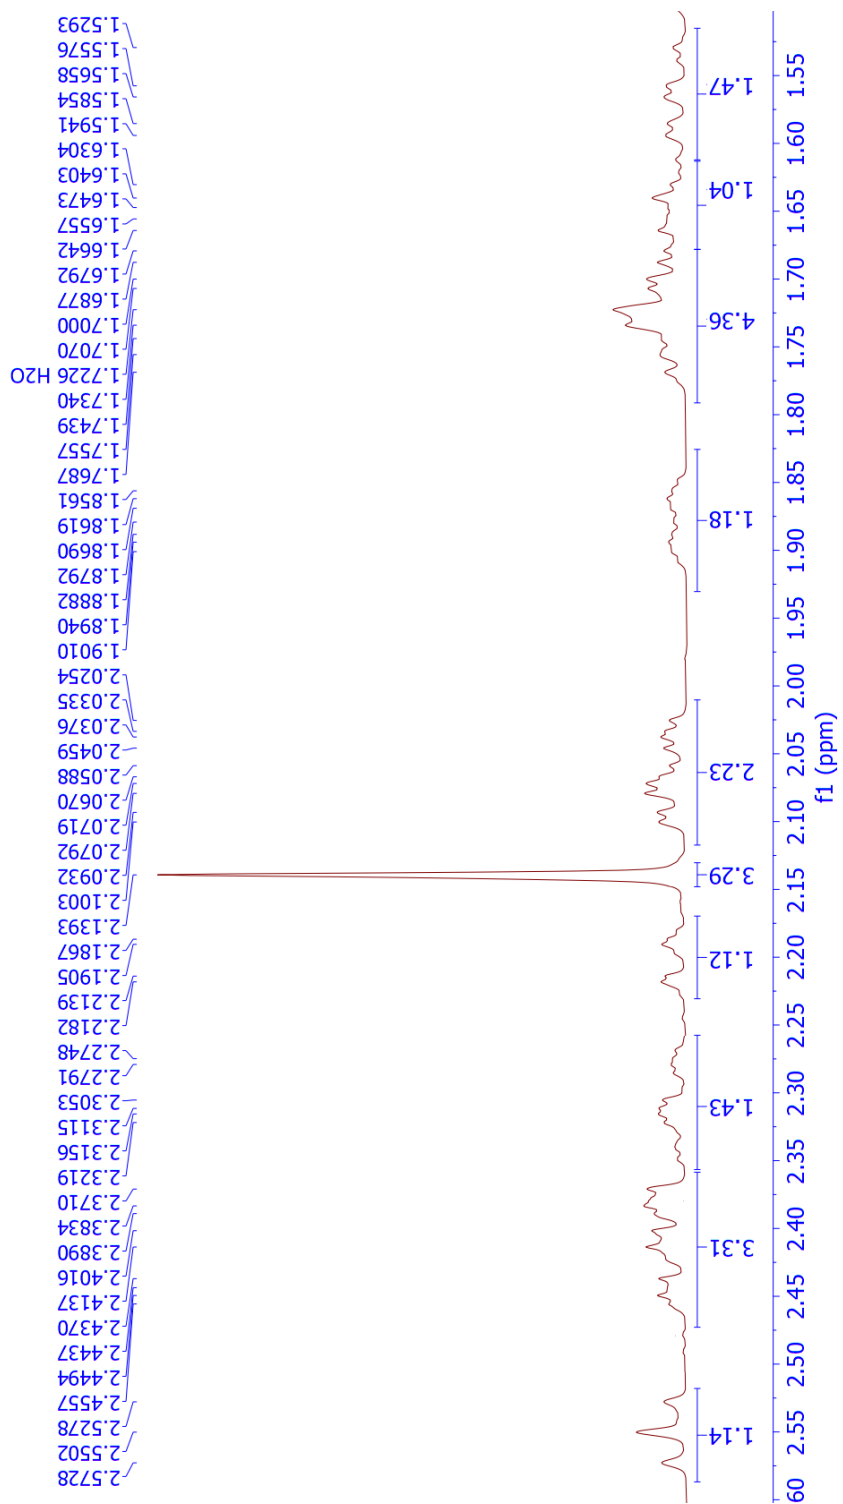

**Figure S-4.**  $^1\text{H-NMR}$  spectrum (400 MHz,  $\text{CDCl}_3$ ) of compound

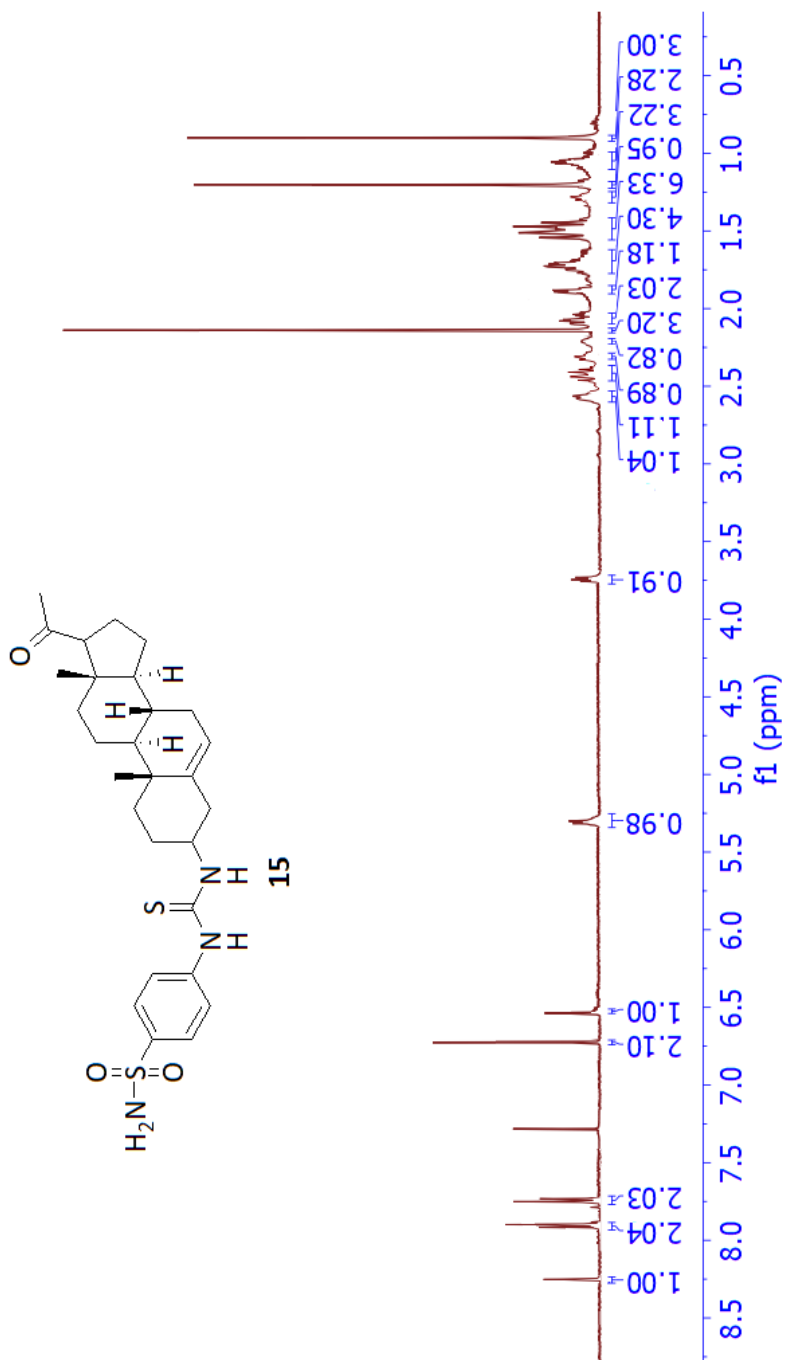

**Figure S-5.** <sup>1</sup>H-NMR spectrum (400 MHz, CDCl<sub>3</sub>) of compound **15**

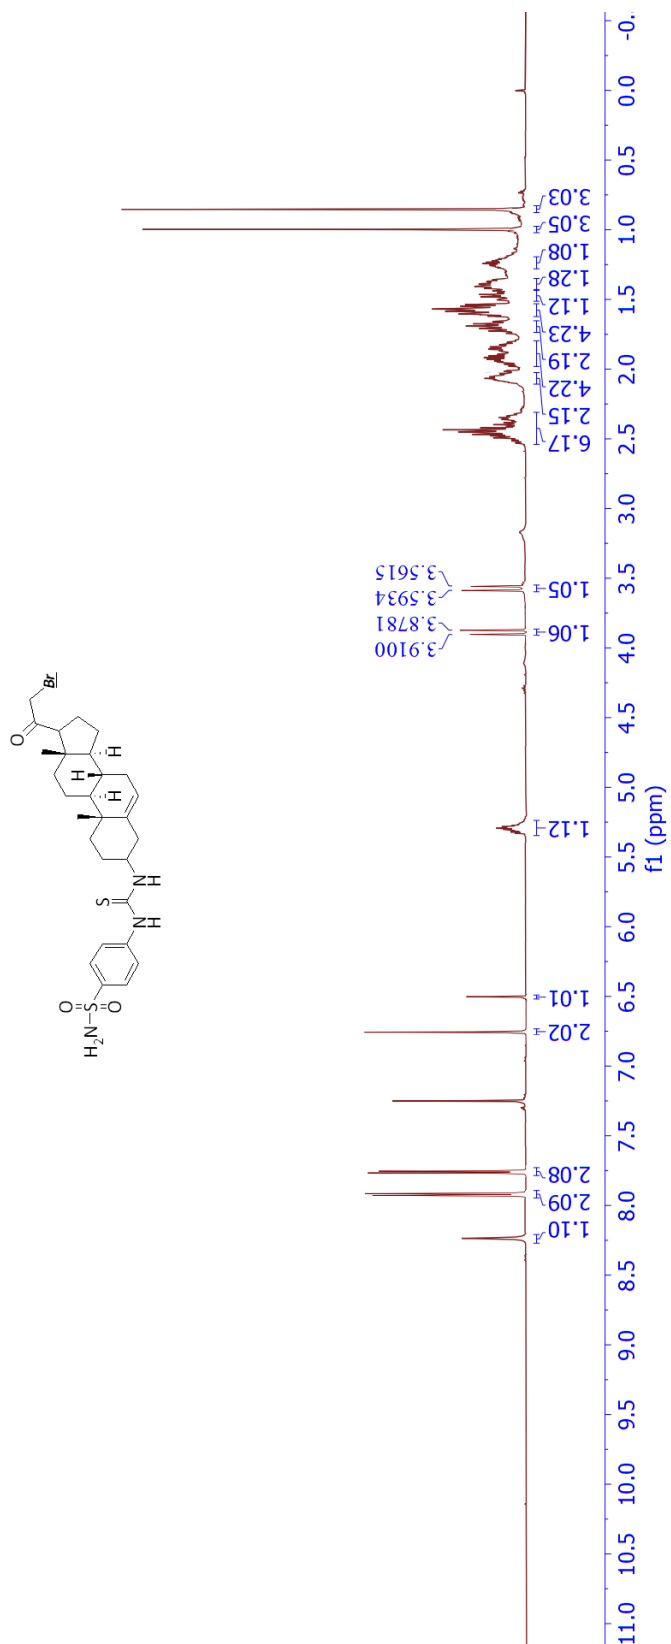

Figure S-6. <sup>1</sup>H-NMR spectrum (400 MHz, CDCl<sub>3</sub>) of compound 16

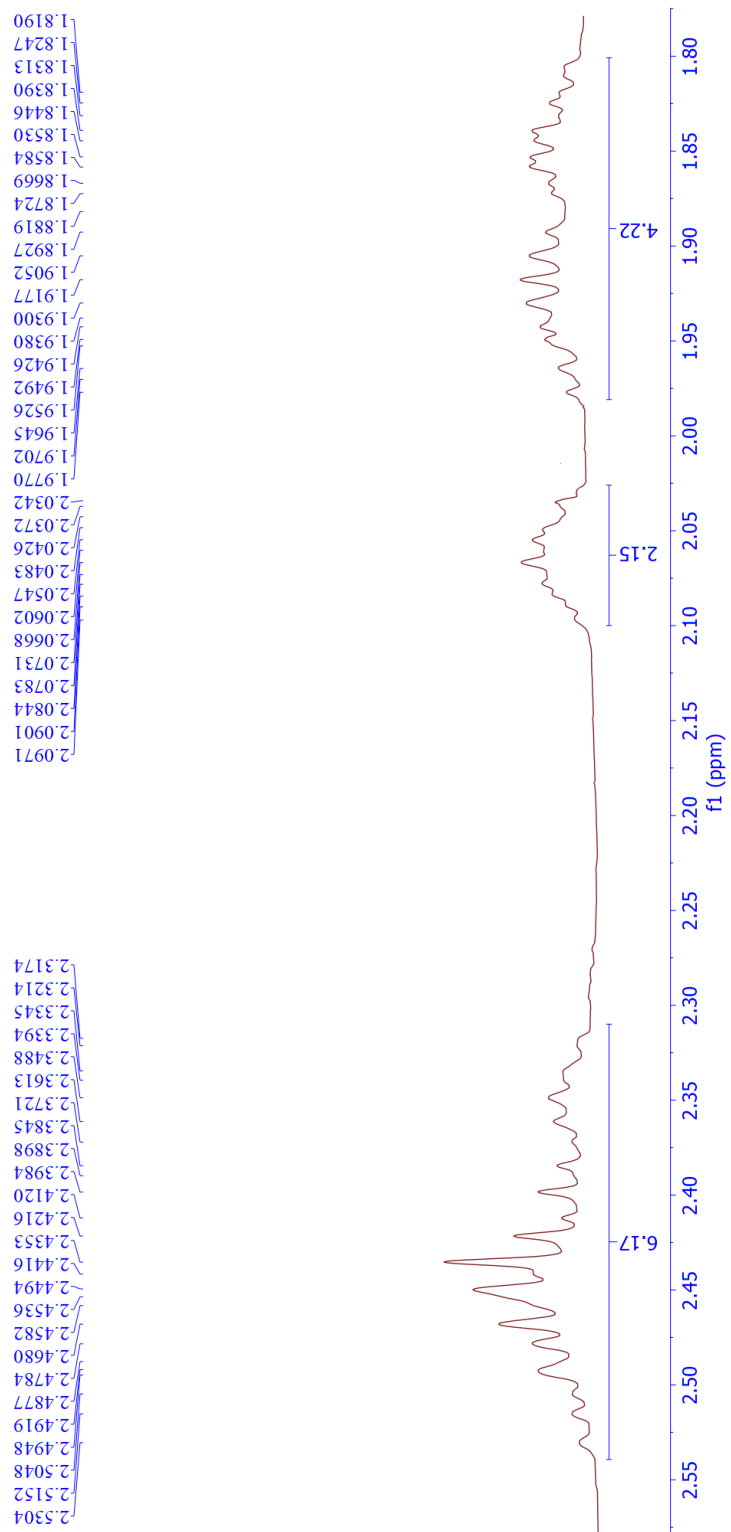

**Figure S-7.**  $^1\text{H-NMR}$  spectrum (400 MHz,  $\text{CDCl}_3$ ) expansion of compound **16**

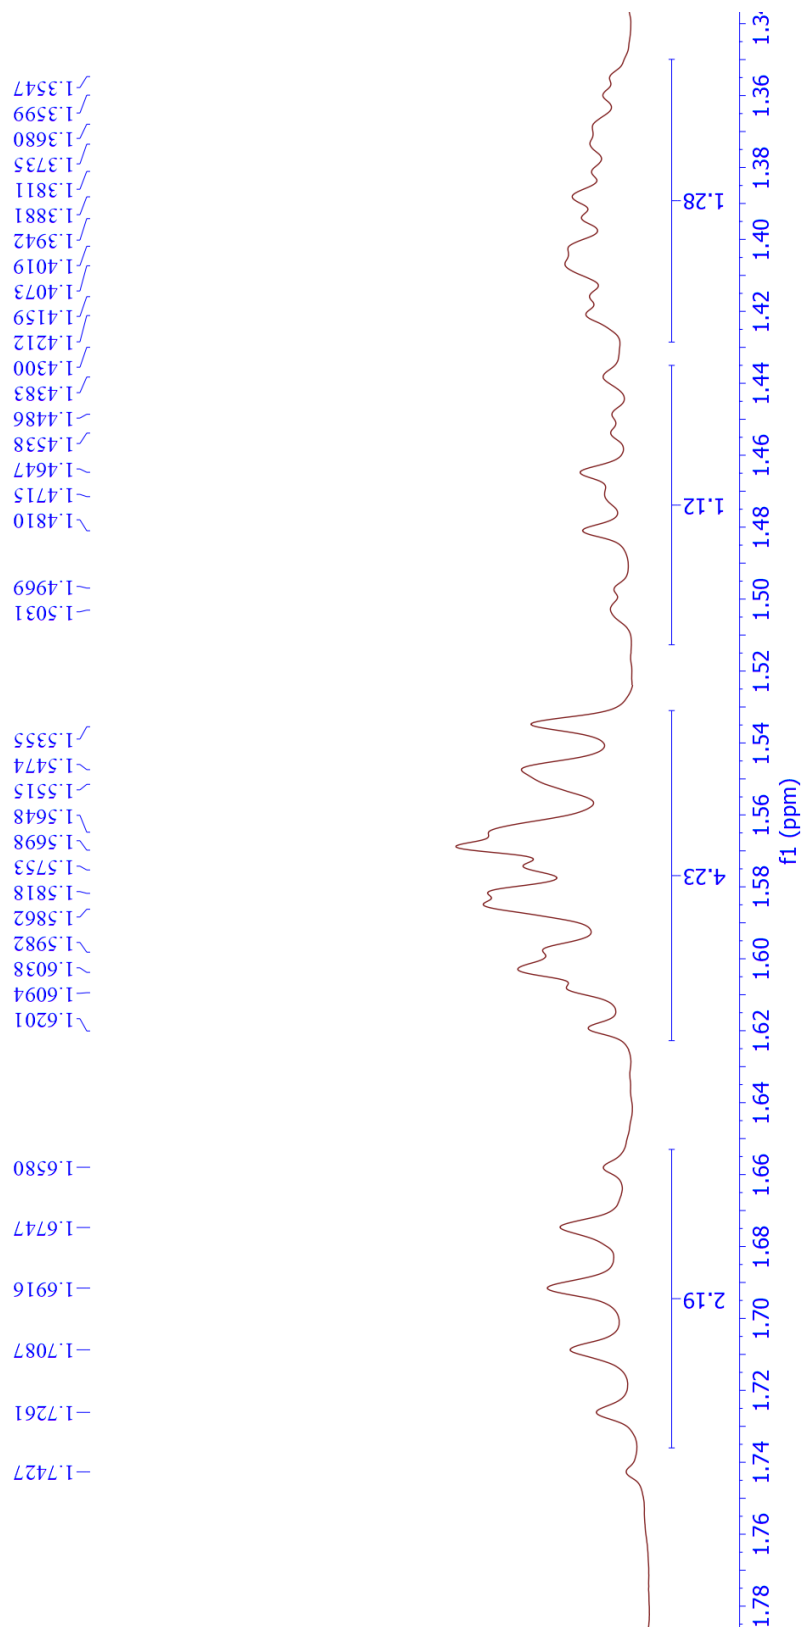

**Figure S-8.**  $^1\text{H-NMR}$  spectrum (400 MHz,  $\text{CDCl}_3$ ) expansion of compound **16**



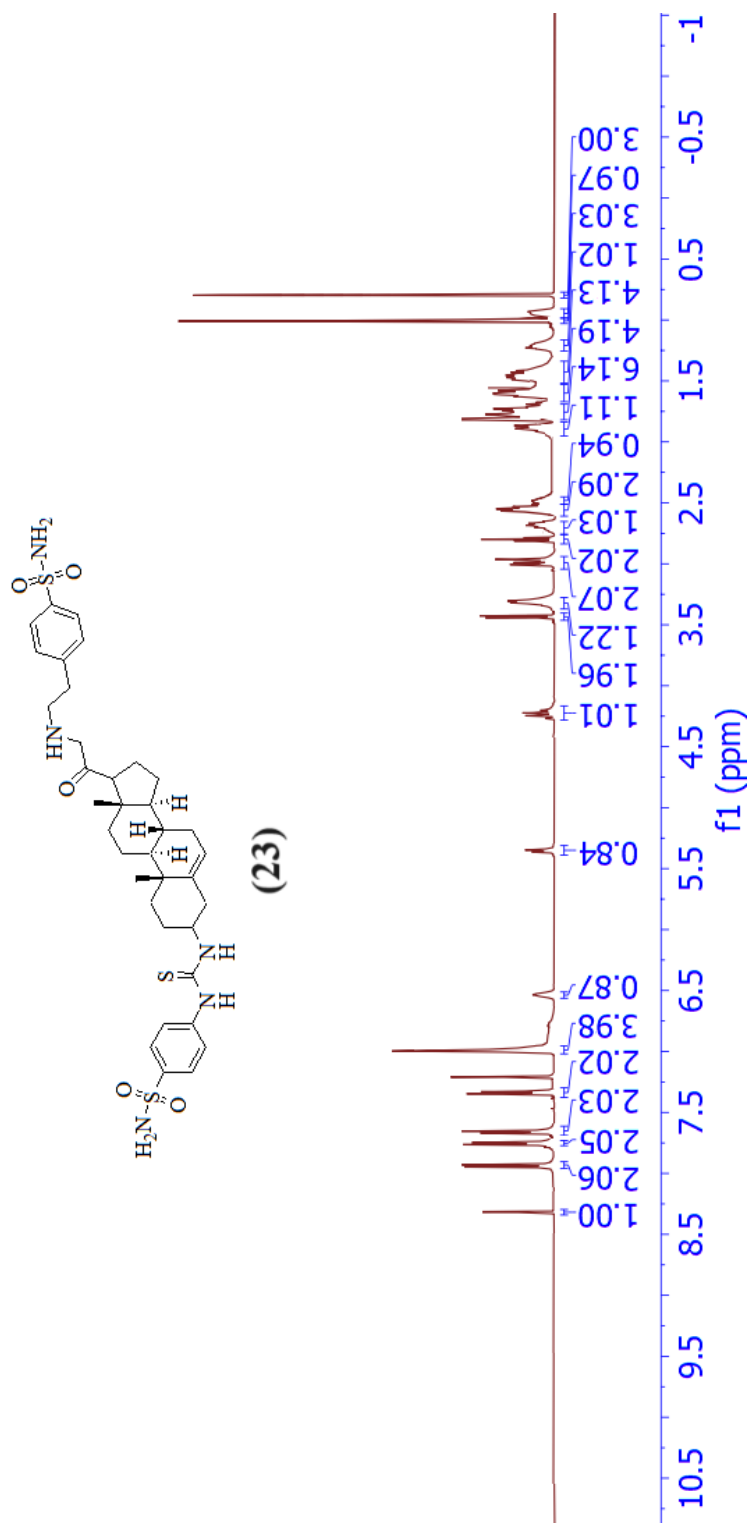

**Figure S-9.**  $^1\text{H-NMR}$  spectrum (400 MHz,  $\text{CDCl}_3$ ) of compound **23**



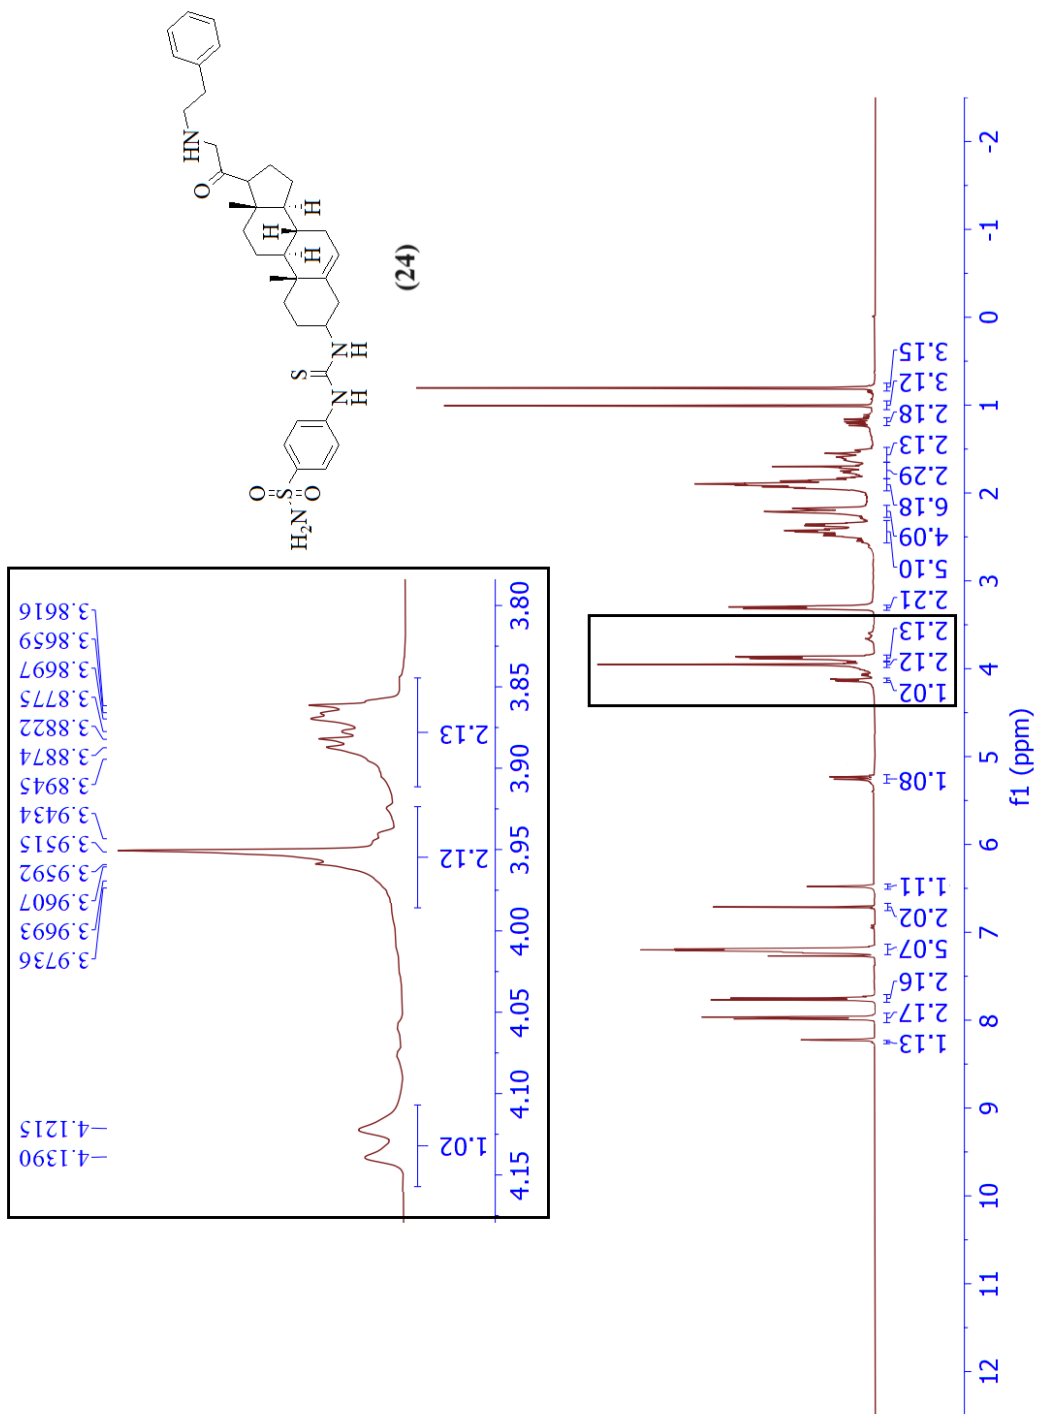

**Figure S-11.**  $^1\text{H-NMR}$  spectrum (400 MHz,  $\text{CDCl}_3$ ) of compound **24**

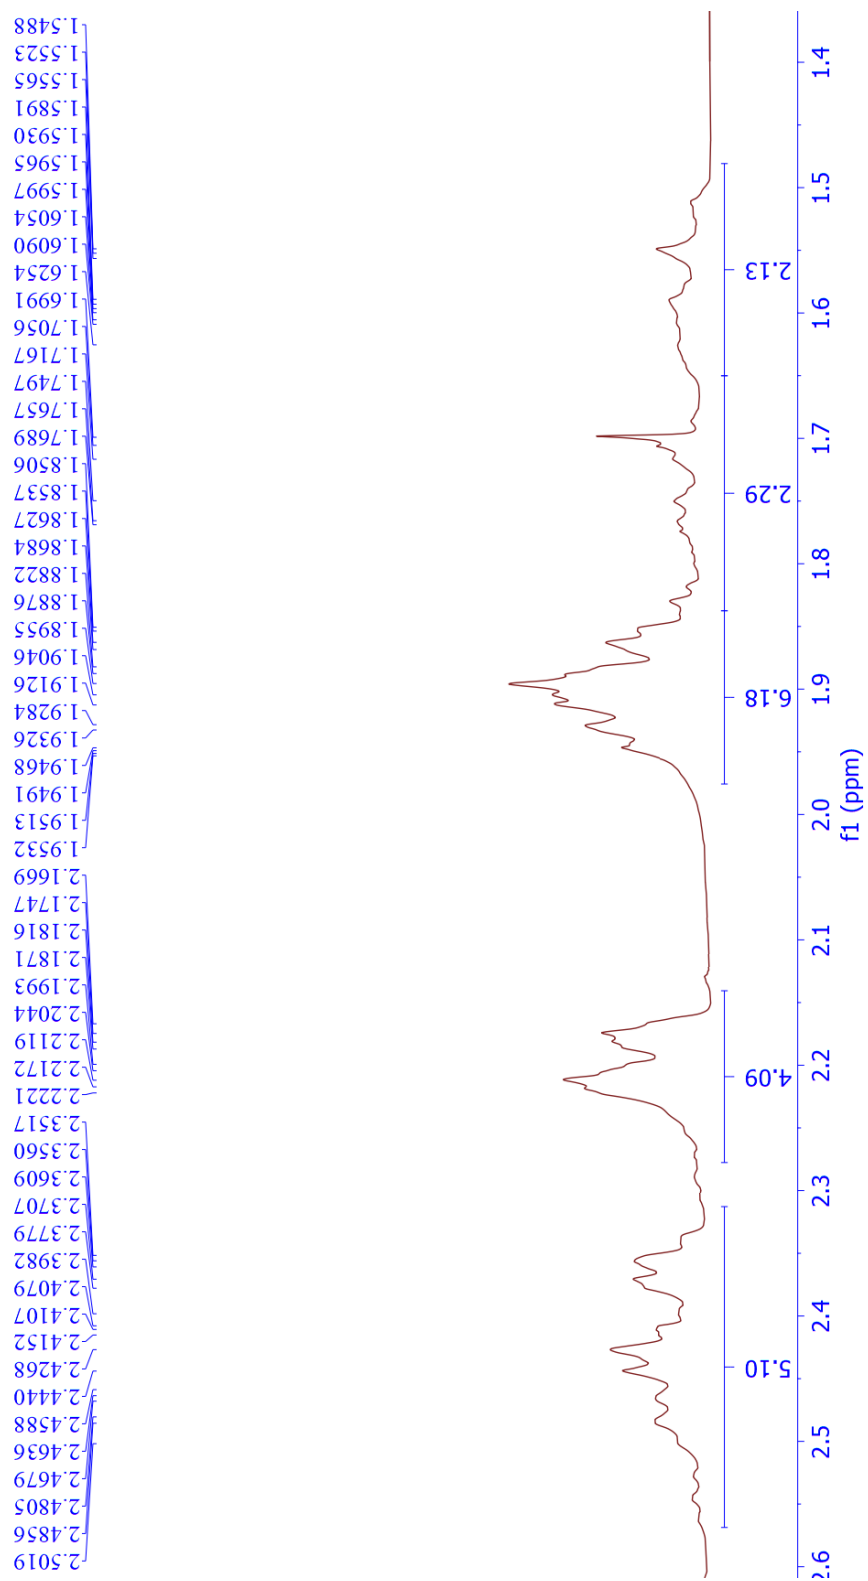

**Figure S-12.** <sup>1</sup>H-NMR spectrum (400 MHz, CDCl<sub>3</sub>) expansion of compound **24**



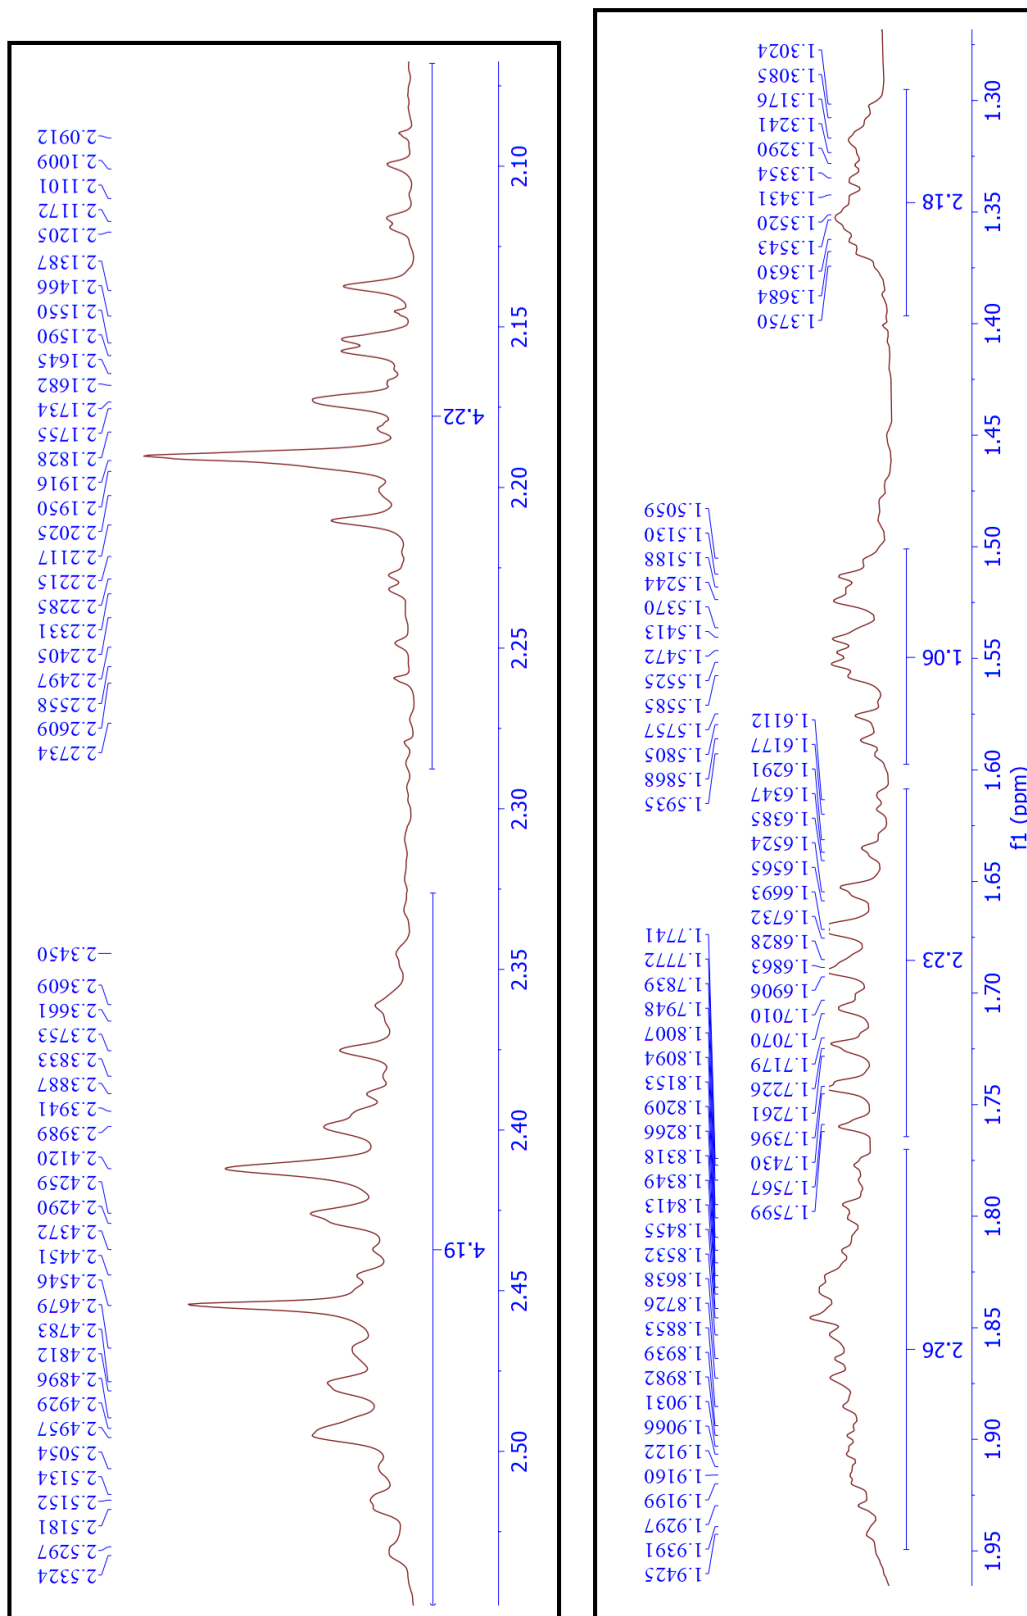

Figure S-14. <sup>1</sup>H-NMR spectrum (400 MHz, CDCl<sub>3</sub>) expansions of compound 25

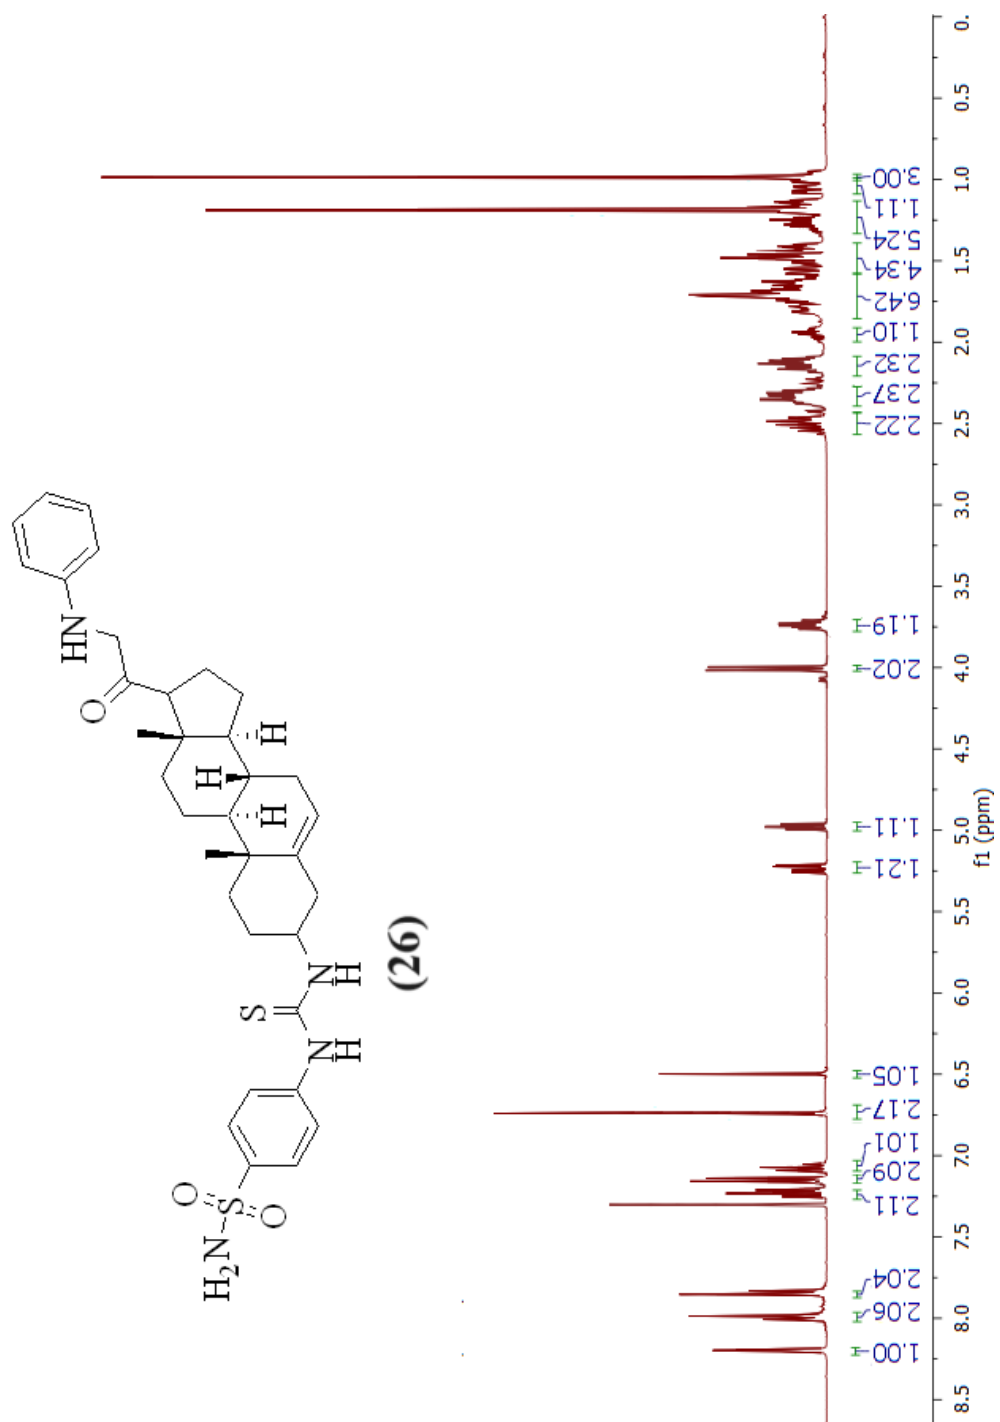

**Figure S-15.**  $^1\text{H-NMR}$  spectrum (400 MHz,  $\text{CDCl}_3$ ) of compound **26**

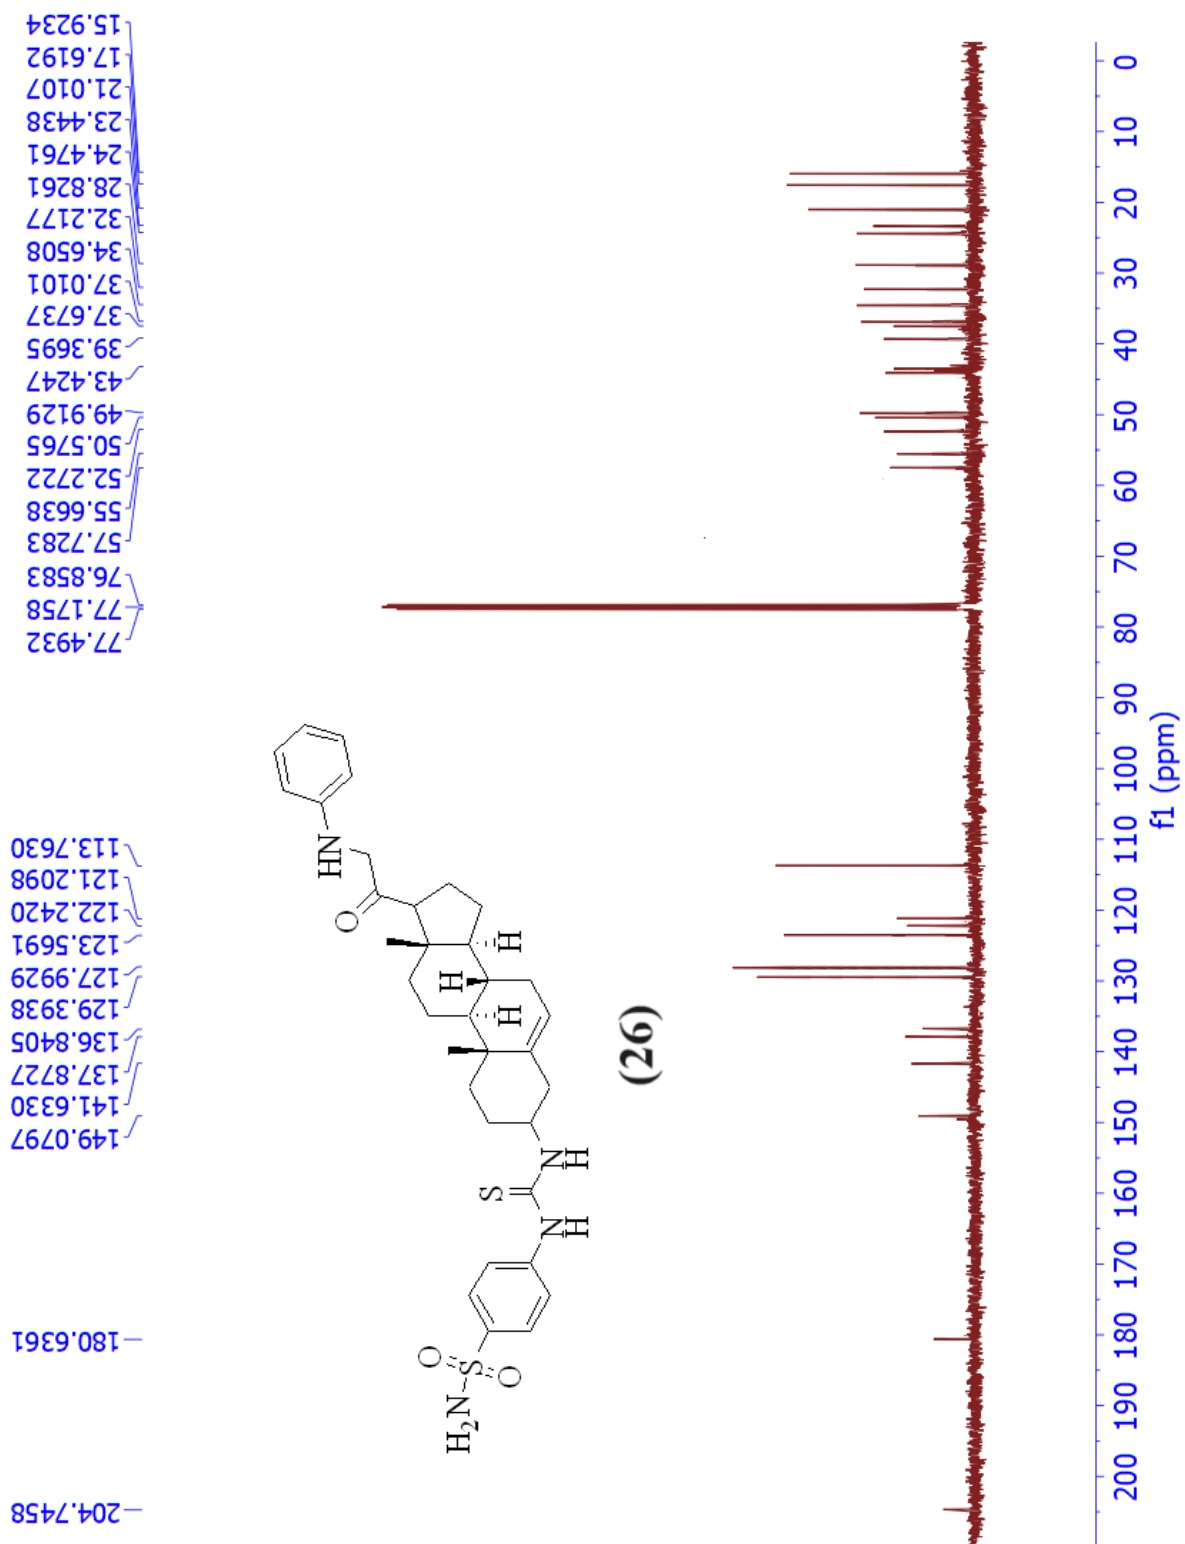

Figure S-16. <sup>13</sup>C-NMR spectrum (100 MHz, CDCl<sub>3</sub>) of compound **26**





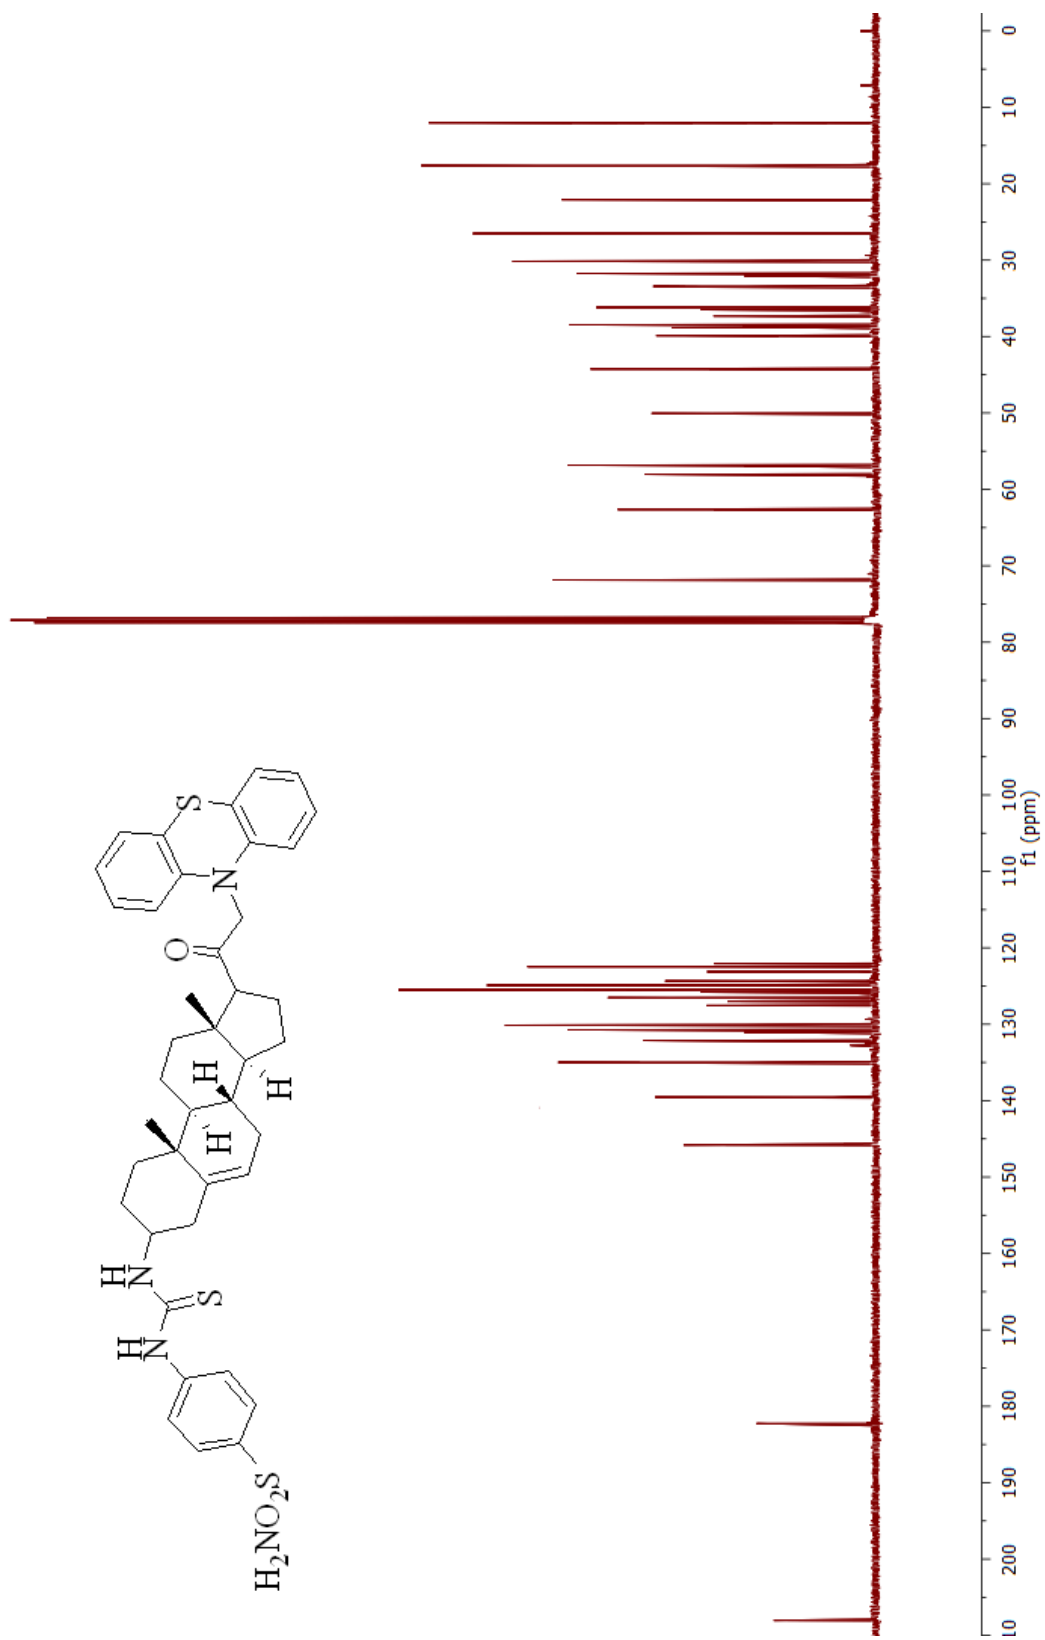

Figure S-18.  $^{13}\text{C}$ -NMR spectrum (100 MHz,  $\text{CDCl}_3$ ) of compound 26

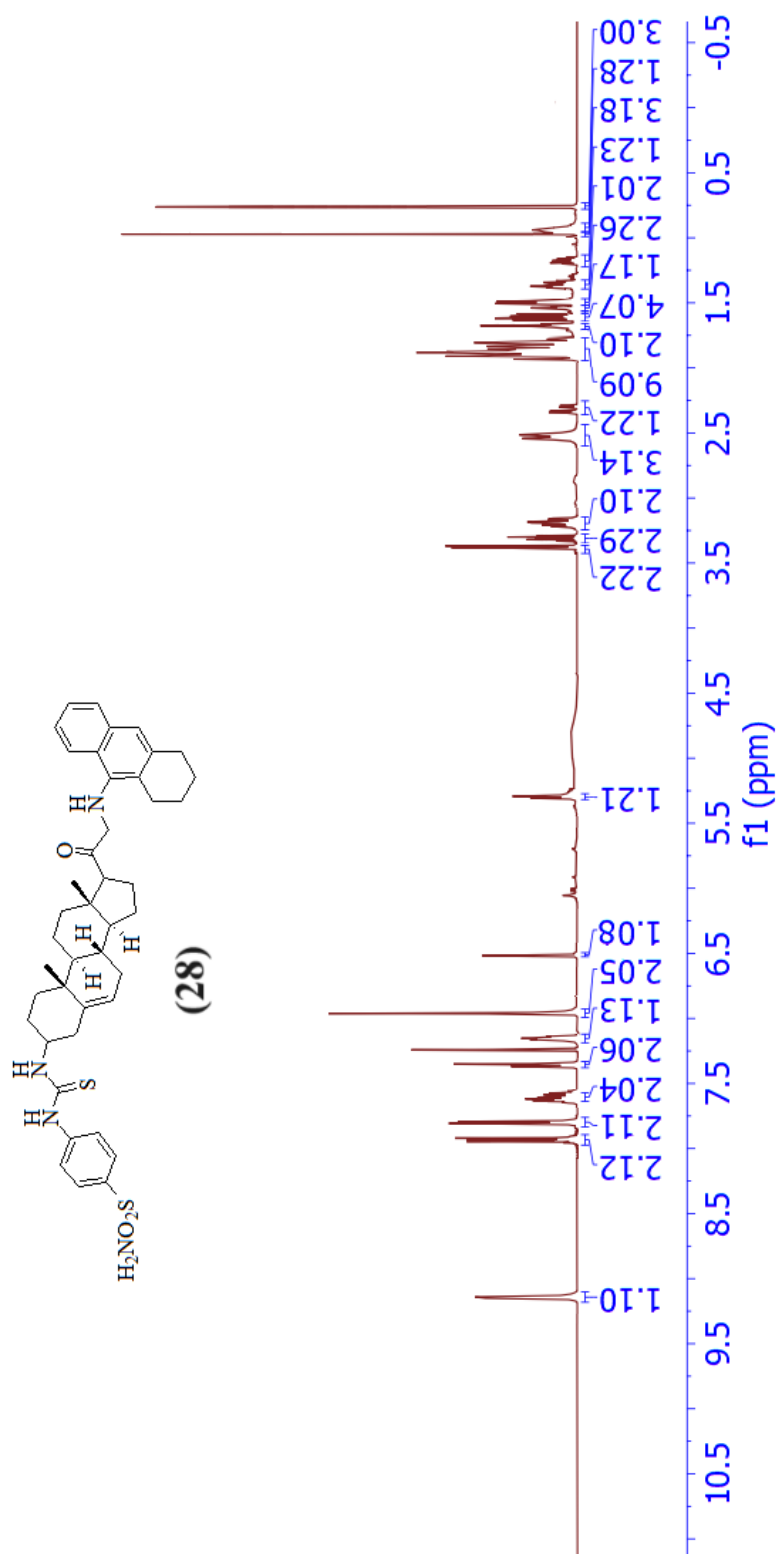

**Figure S-19.**  $^1\text{H}$ -NMR spectrum (400 MHz,  $\text{CDCl}_3$ ) of compound **28**

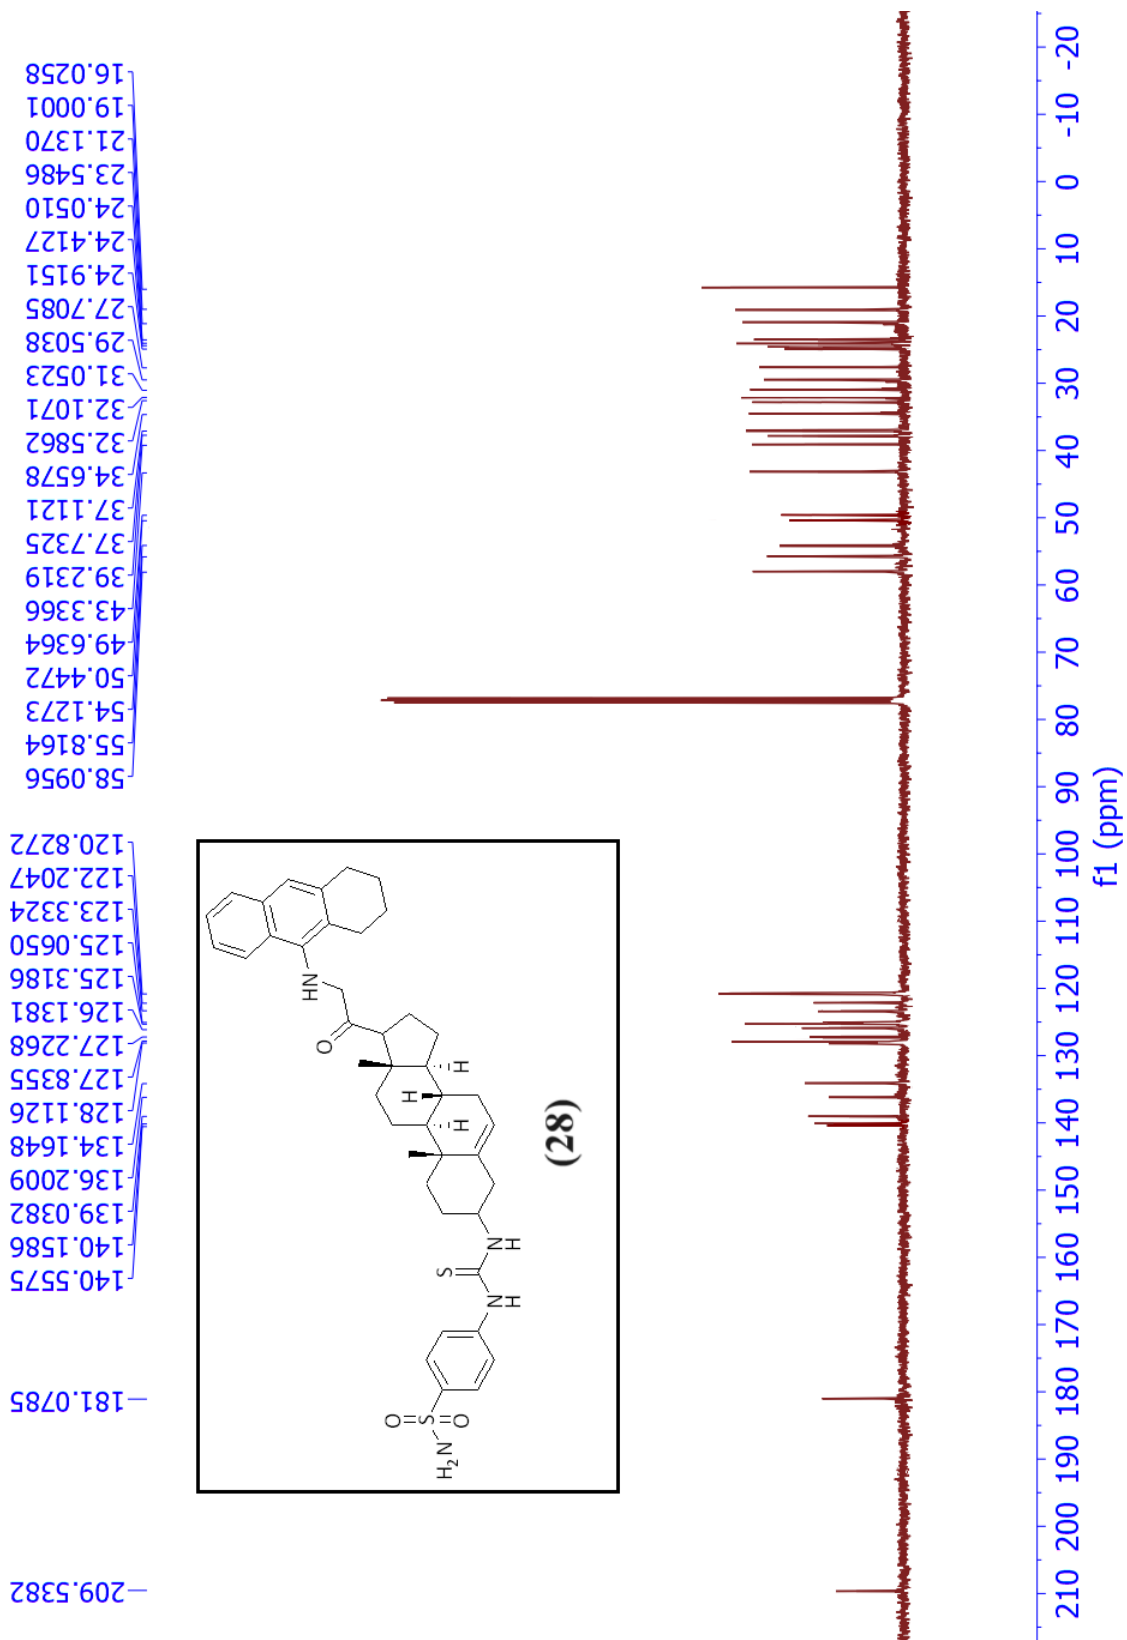

Figure S-20.  $^{13}\text{C}$ -NMR spectrum (100 MHz,  $\text{CDCl}_3$ ) of compound 28

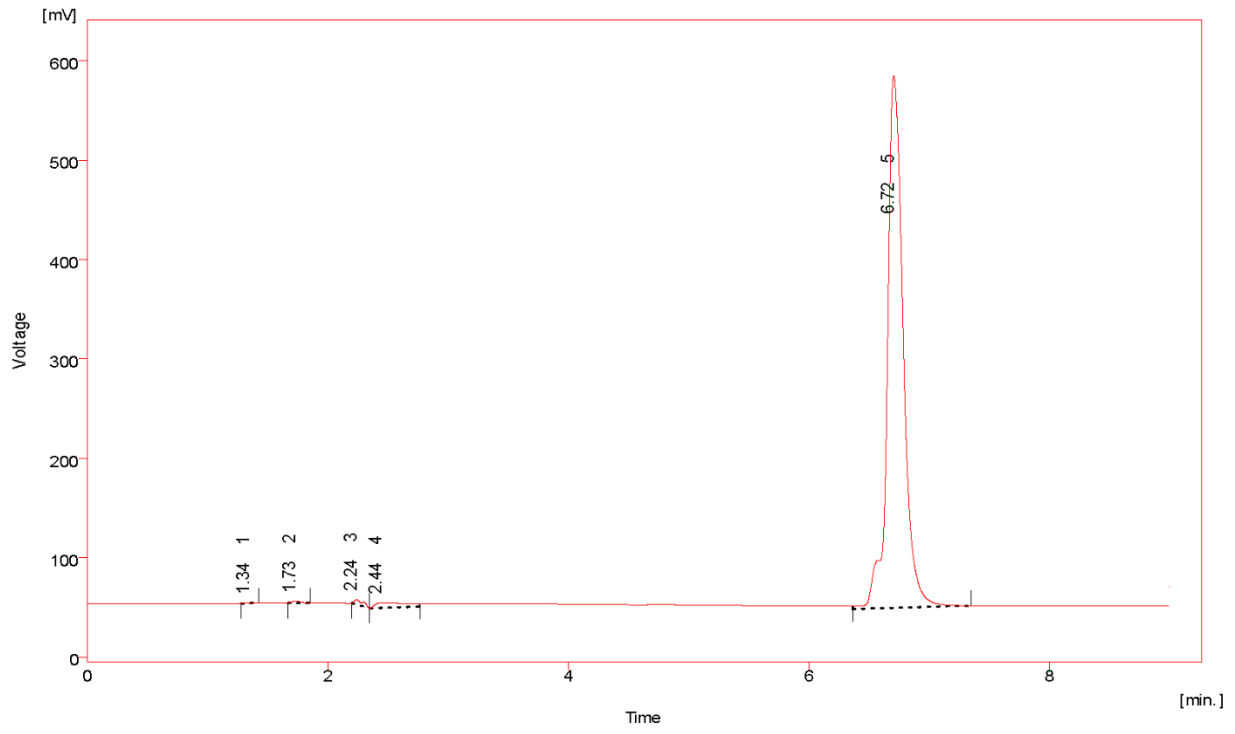

**Figure S-21.** HPLC chromatogram of compound **23**

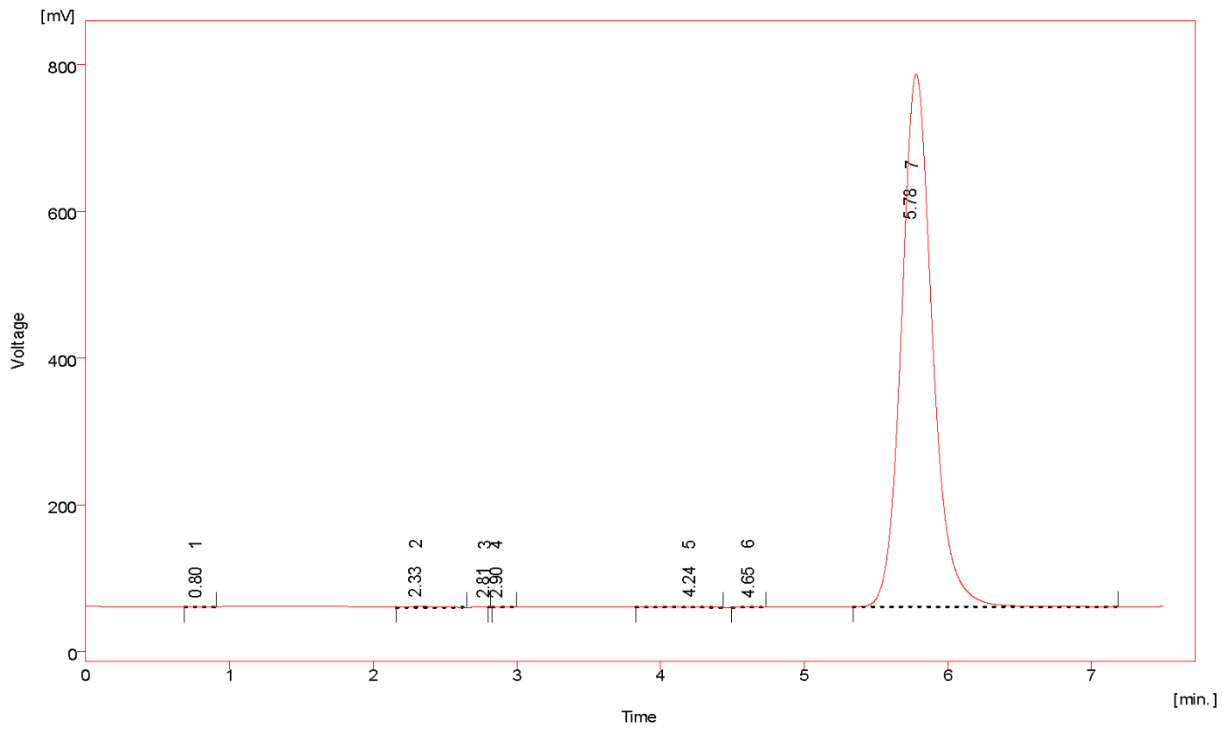

**Figure S-22.** HPLC chromatogram of compound **25**

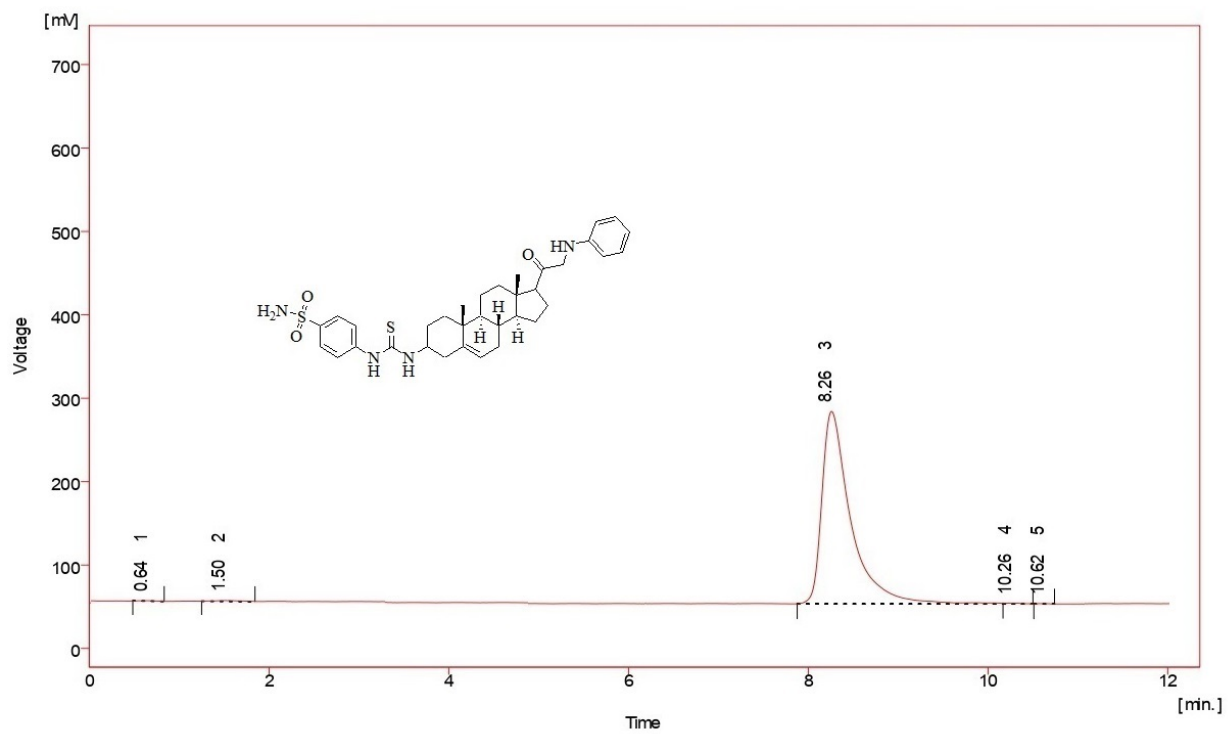

**Figure S-23.** HPLC chromatogram of compound 26

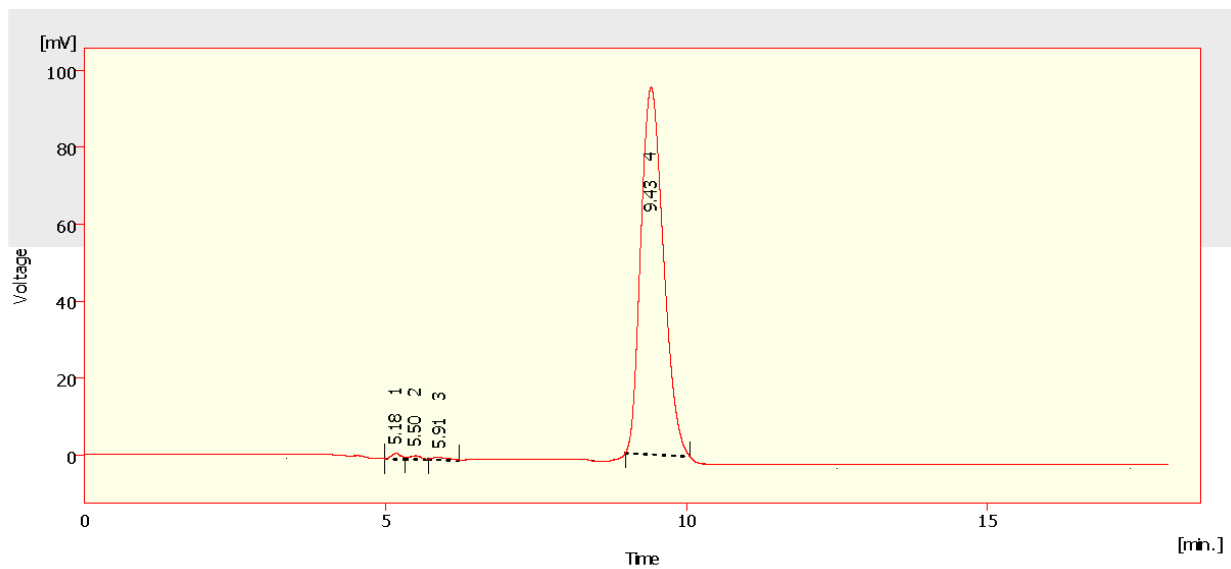

**Figure S-24.** HPLC chromatogram of compound **27**



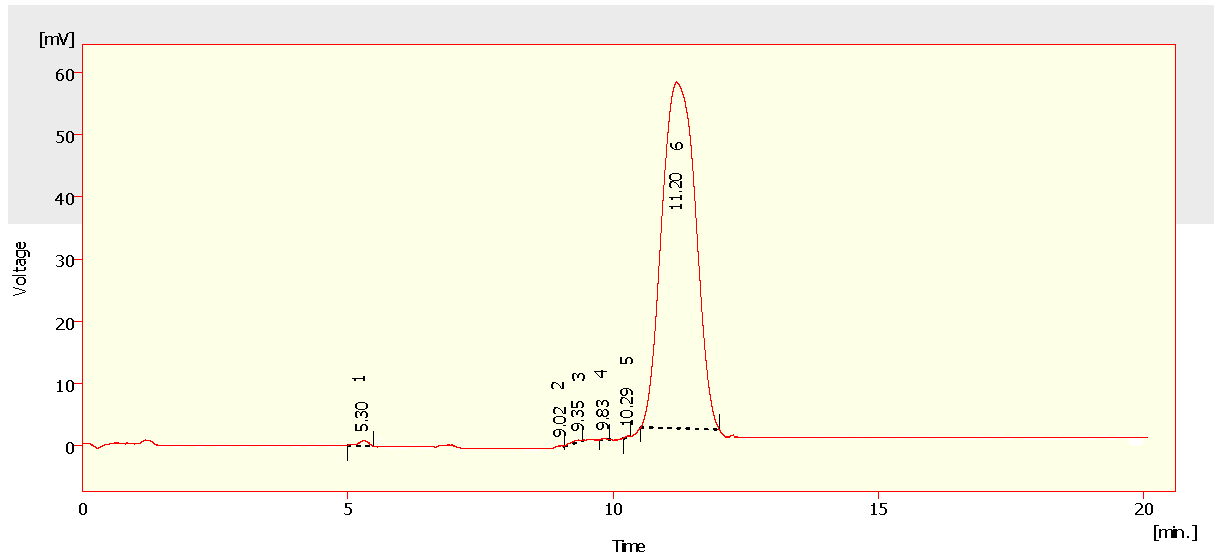

**Figure S-25.** HPLC chromatogram of compound **28**
